# Supplementary material for: Receptor for Advanced Glycation End Products (RAGE) Deficiency Attenuates the Development of Atherosclerosis in Diabetes
Source: Oxford University Press journal article supplement (doi:10.2337/db07-1808), 2008-05-30
Supplement: db-07-1808_sup_tabl_1.doc [file db-07-1808_sup_tabl_1.doc]

**Supplementary Table 1**. Real time RT-PCR probe and primer designs

|  | Probe Sequence 5’FAM-3’TAMRA | Forward Primer 5’-3’ | Reverse Primer 5’-3’ | GeneBank Accession Number |
| --- | --- | --- | --- | --- |
| p65 | AGCTCAAGATCTGCCG | TCTCACATCCGATTTTTGATAACC | CGAGGCAGCTCCCAGAGTT | M61909 |
| rac1 | ACAGCGAGGACTCAA | CGAAAGAGATCGGTGCTGTCA | AGAGAACCGCTCGGATAGCTT | NM_009007 |
| p47phox | CCCAGCCTTCTGCAGAT | CCGGCTATTTCCCATCCAT | TCGCTGGGCCTGGGTTAT | NM_010876 |
| gp91phox | CAACTGGACAGGAACCT | AGTGCGTGTTGCTCGACAAG | CCAAGCTACCATCTTATGGAAAGTG | U43384 |
| MCP-1 | AATGGGTCCAGACATAC | GTCTGTGCTGACCCCAAGAAG | TGGTTCCGATCCAGGTTTTTA | NM_011333 |
| CD36 | AGAATCTGAAGAGACCTTAC | AAGCCAGCTAGAAAAATAGAAGCATT | AGTCTCATTTAGCCACAGTATAGGTACAA | NM_007643 |
| VCAM-1 | CCAAAATCCTGTGGAGCAG | CTGCTCAAGTGATGGGATACCA | ATCGTCCCTTTTTGTAGACATGAAG | L22354 |
| Tissue Factor | ACAAACGCCCCAAAGT | GGGAGGAGCCGCCATT | CAAGGTTTGTGTCTCGGTAAGGT | M26071 |
| RAGE | CACAGCCCGGATTG | GCTGTAGCTGGTGGTCAGAACA | CCCCTTACAGCTTAGCACAAGTG | NM_007425 |
| AT1R | TCTCGCCTCCGCCG | CCATTGTCCACCCGATGAA | TGACTTTGGCCACCAGCAT | NM_177322 |
| AGE-R1 | ATCAACGTGGAGACCAT | CCCGTCGGTGGAAGATTTT | GCTGCCGCCACCATCA | D89063 |
| AGE-R2 | CAAGTACCGCTCTGAGGT | GCCCAGGCCCTTCTCAGT | CCTCCGGAACAGGTATGTCAGT | NM_008925 |
| AGE-R3 | CTGGCTCTGGAAACC | CAGACAGCTTTTCGCTTAACGA | CCATGCACCCGGATATCC | X16834 |
| Collagen I | ATCGACCCTAACCAAG | GACTGGAAGAGCGGAGAGTACTG | CCTTGATGGCGTCCAGGTT | NM_007742 |
| Collagen III | AATATCAAACACGCAAGGC | GGGAATGGAGCAAGACAGTCTT | TGCGATATCTATGATGGGTAGTCTCA | BC58724 |
| Collagen IV  alpha I | CAGTGCCCTAACGGT | GGCGGTACACAGTCAGACCAT | GGAATAGCCGATCCACAGTGA | J04694 |
| Collagen IV alpha III | CCCTGAAGGAACACAGC | ACCACGGCCATTCCTTCAT | CAAAAAGAAGAGAAAACCCACTATAGAGT | NM_007734 |
| MMP-2 | TGCACCAGCGCCGG | TCACTTTCCTGGGCAACAAGT | GCCACGAGGAATAGGCTATATCC | NM_008610 |
| MMP-9 | CATCAAAAACATCCACATTG | TGAGTCCGGCAGACAATCCT | CGCCCTGGATCTCAGCAATA | NM_013599 |
