# Supplementary material for: Receptor for Advanced Glycation End Products (RAGE) Deficiency Attenuates the Development of Atherosclerosis in Diabetes
Source: Oxford University Press journal article supplement (doi:10.2337/db07-1808), 2008-05-30
Supplement: db-07-1808_supp_figs.doc [file db-07-1808_supp_figs.doc]

**
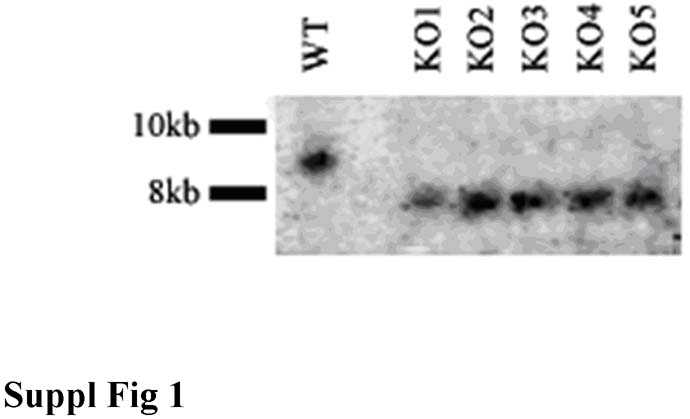
**

Representative Southern blot presenting the RAGE wild type (WT) genotype at 10kb and the RAGE-/-/apoE-/- at 8kb. KO; knock out.

**
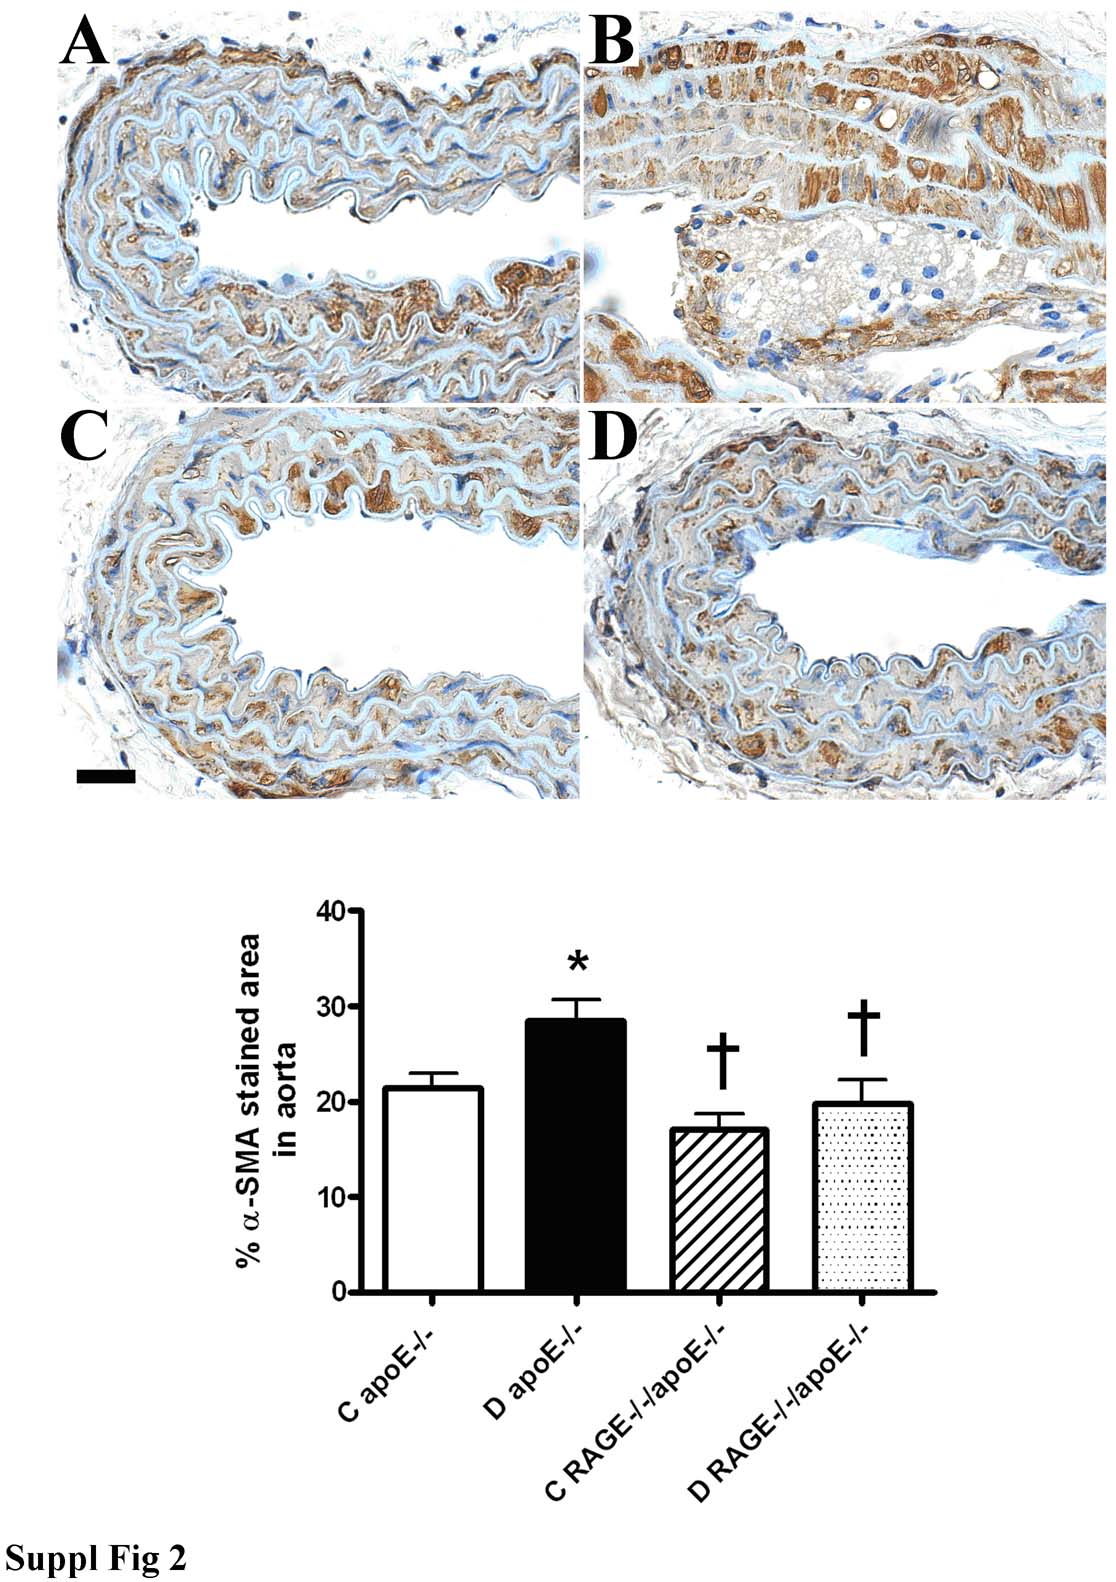
**Upper panel: Representative aortic sections demonstrating alpha-SMA staining in control apoE-/- (A), diabetic apoE-/- (B), control RAGE-/-/apoE-/- (C), and diabetic RAGE-/-/apoE-/- (D). Scale bar: 20µm. Lower panel: Graph presenting percentage of alpha-SMA positive area in each group. **P*<0.05 vs control apoE-/-, †*P*<0.01 vs diabetic apoE-/-. Data are expressed as mean±SEM.

**
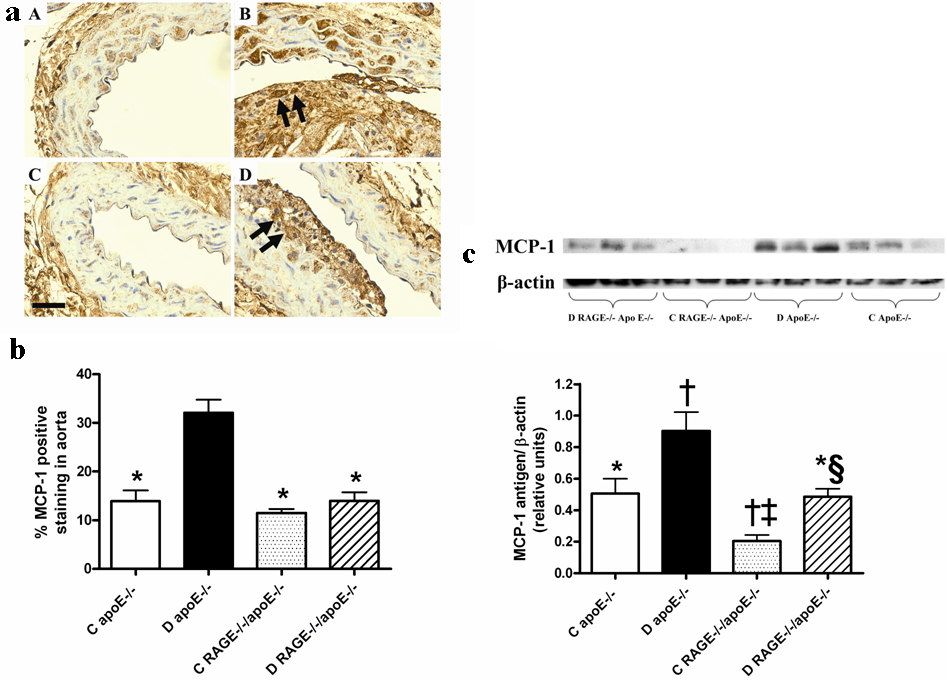
**

**Supplementary Figure 3**

Immunohistochemistry and Western blotting for MCP-1. (a) Representative aortic sections demonstrating MCP-1 staining in control apoE-/- (A), diabetic apoE-/- (B), control RAGE-/-/apoE-/- (C), and diabetic RAGE-/-/apoE-/- (D). Scale bar: 20µm. The arrows indicate positively stained cells (double arrows; macrophages/foam cells). (b) Graph presenting percentage of MCP-1 positive area in each group. **P*<0.01 vs diabetic apoE-/-. Data are expressed as mean±SEM. (c) Aortic protein extracts were subjected to Western blotting with an antibody to MCP-1 followed by staining with an antibody to β-actin (n=3/group). The ratio of MCP-1/β-actin was determined. **P*<0.01 vs diabetic apoE-/-, †*P*<0.01 vs control apoE-/-, ‡*P*<0.05 vs control apoE-/-,. §*P*<0.05 vs control RAGE-/-/apoE-/-. Data are expressed as mean±SEM.

**
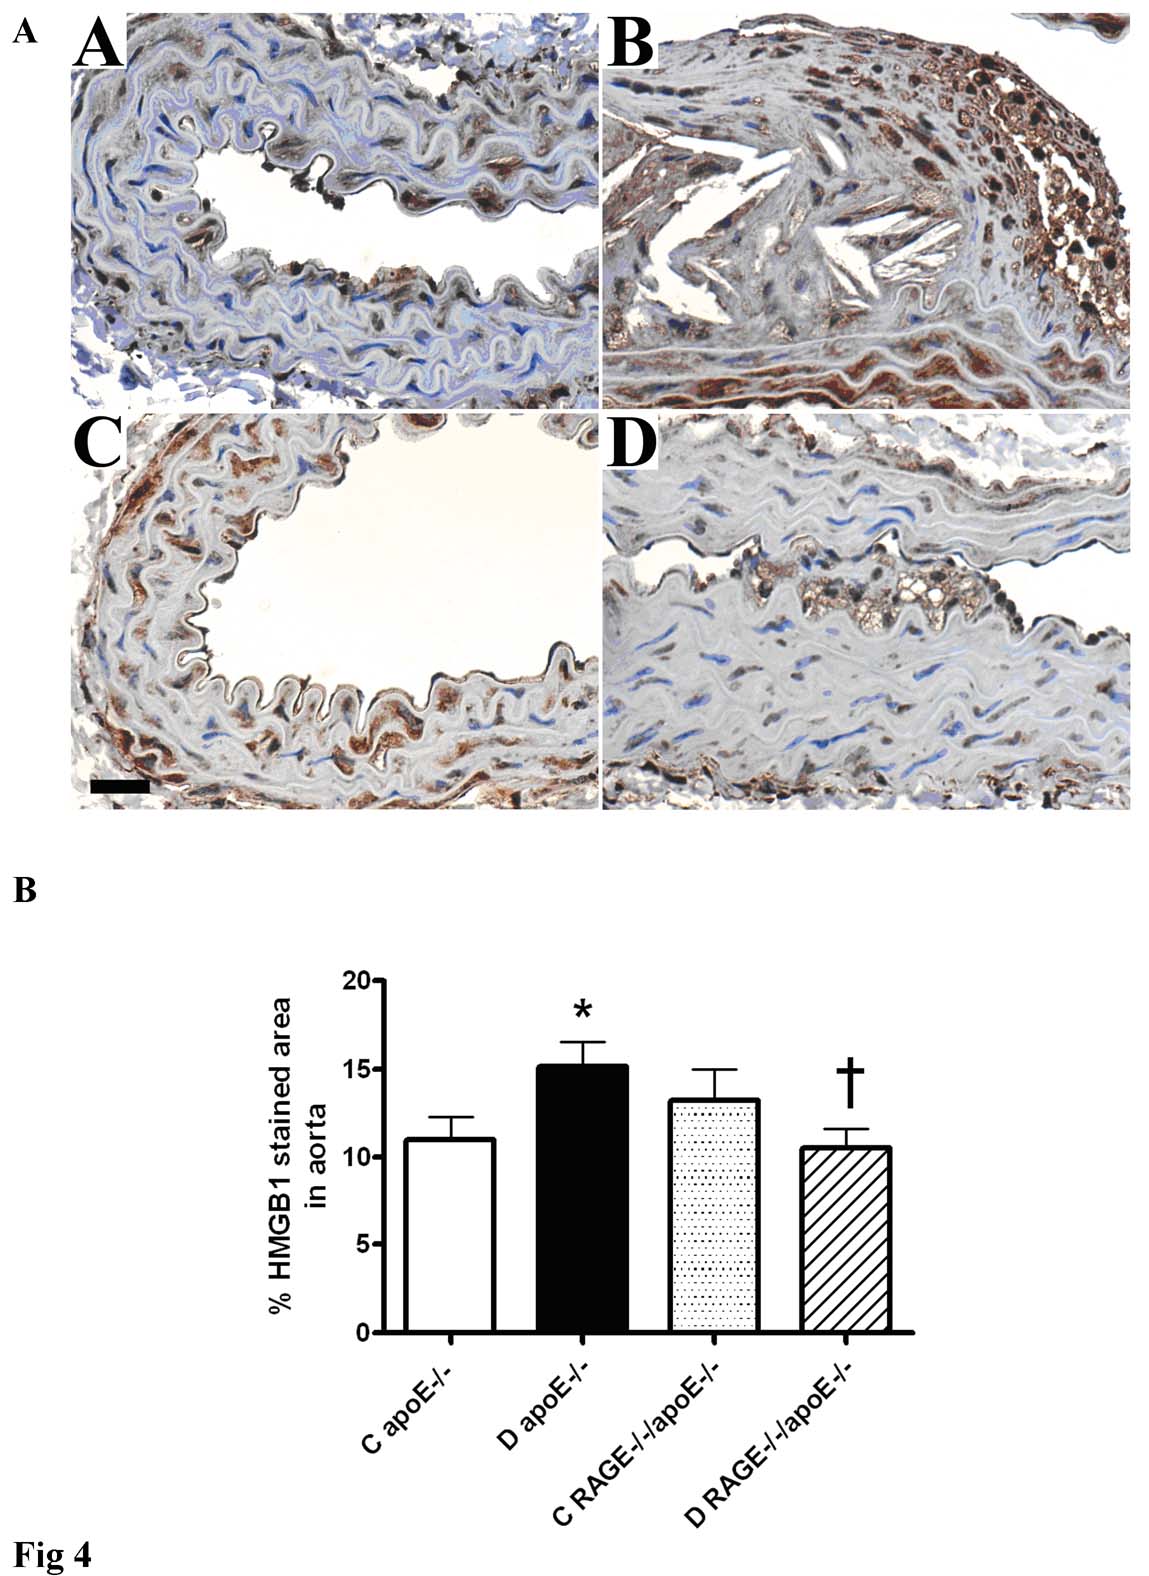
Supplementary Figure 4**

Upper panel: Representative aortic sections demonstrating VCAM-1 immunostaining in control apoE-/- (A), diabetic apoE-/- (B), control RAGE-/-/apoE-/- (C), and diabetic RAGE-/-/apoE-/- (D). Scale bar: 40µm. The arrows indicate positively stained cells (single arrows; endothelial cells, double arrows; macrophages/foam cells). Lower panel: Graph presenting percentage of VCAM-1 positive area in each group. **P*<0.05 vs diabetic apoE-/-, †*P*<0.01 vs diabetic apoE-/-. Data are expressed as mean±SEM.

**
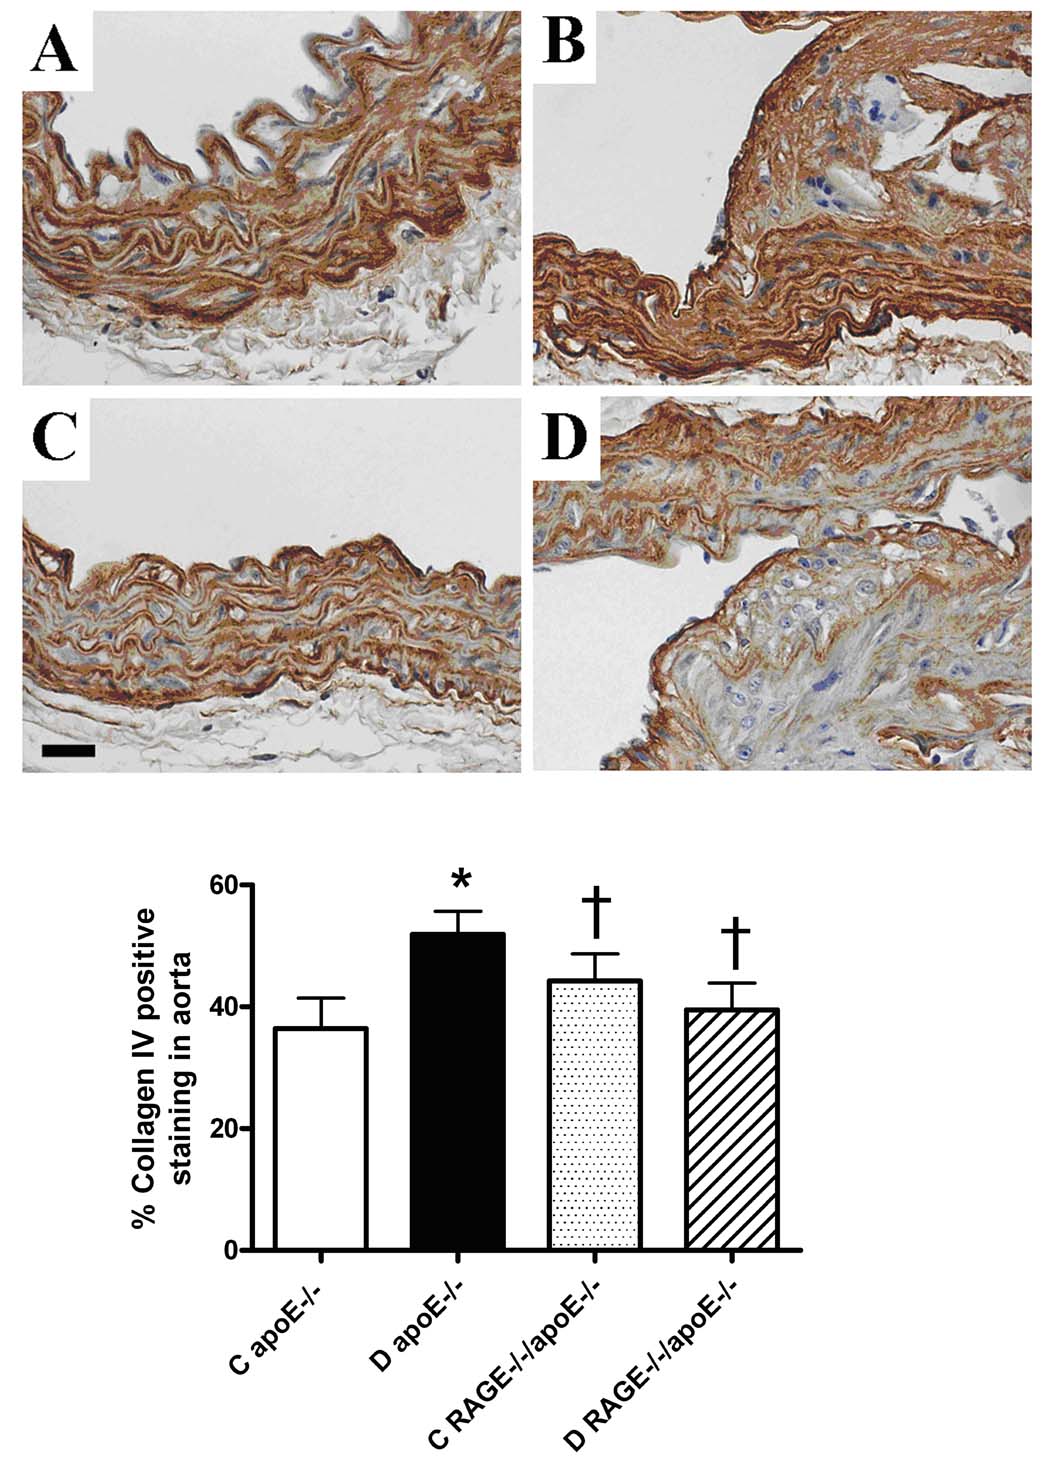
Supplementary Figure 5**

Upper panel**:** Representative aortic sections demonstrating collagen IV staining in control apoE-/- (A), diabetic apoE-/- (B), control RAGE-/-/apoE-/- (C), and diabetic RAGE-/-/apoE-/- (D). Scale bar: 20µm. Lower panel: Graph presenting percentage of collagen IV positive area in each group. **P*<0.05 vs control apoE-/-, †*P*<0.01 vs diabetic apoE-/-. Data are expressed as mean±SEM.

**
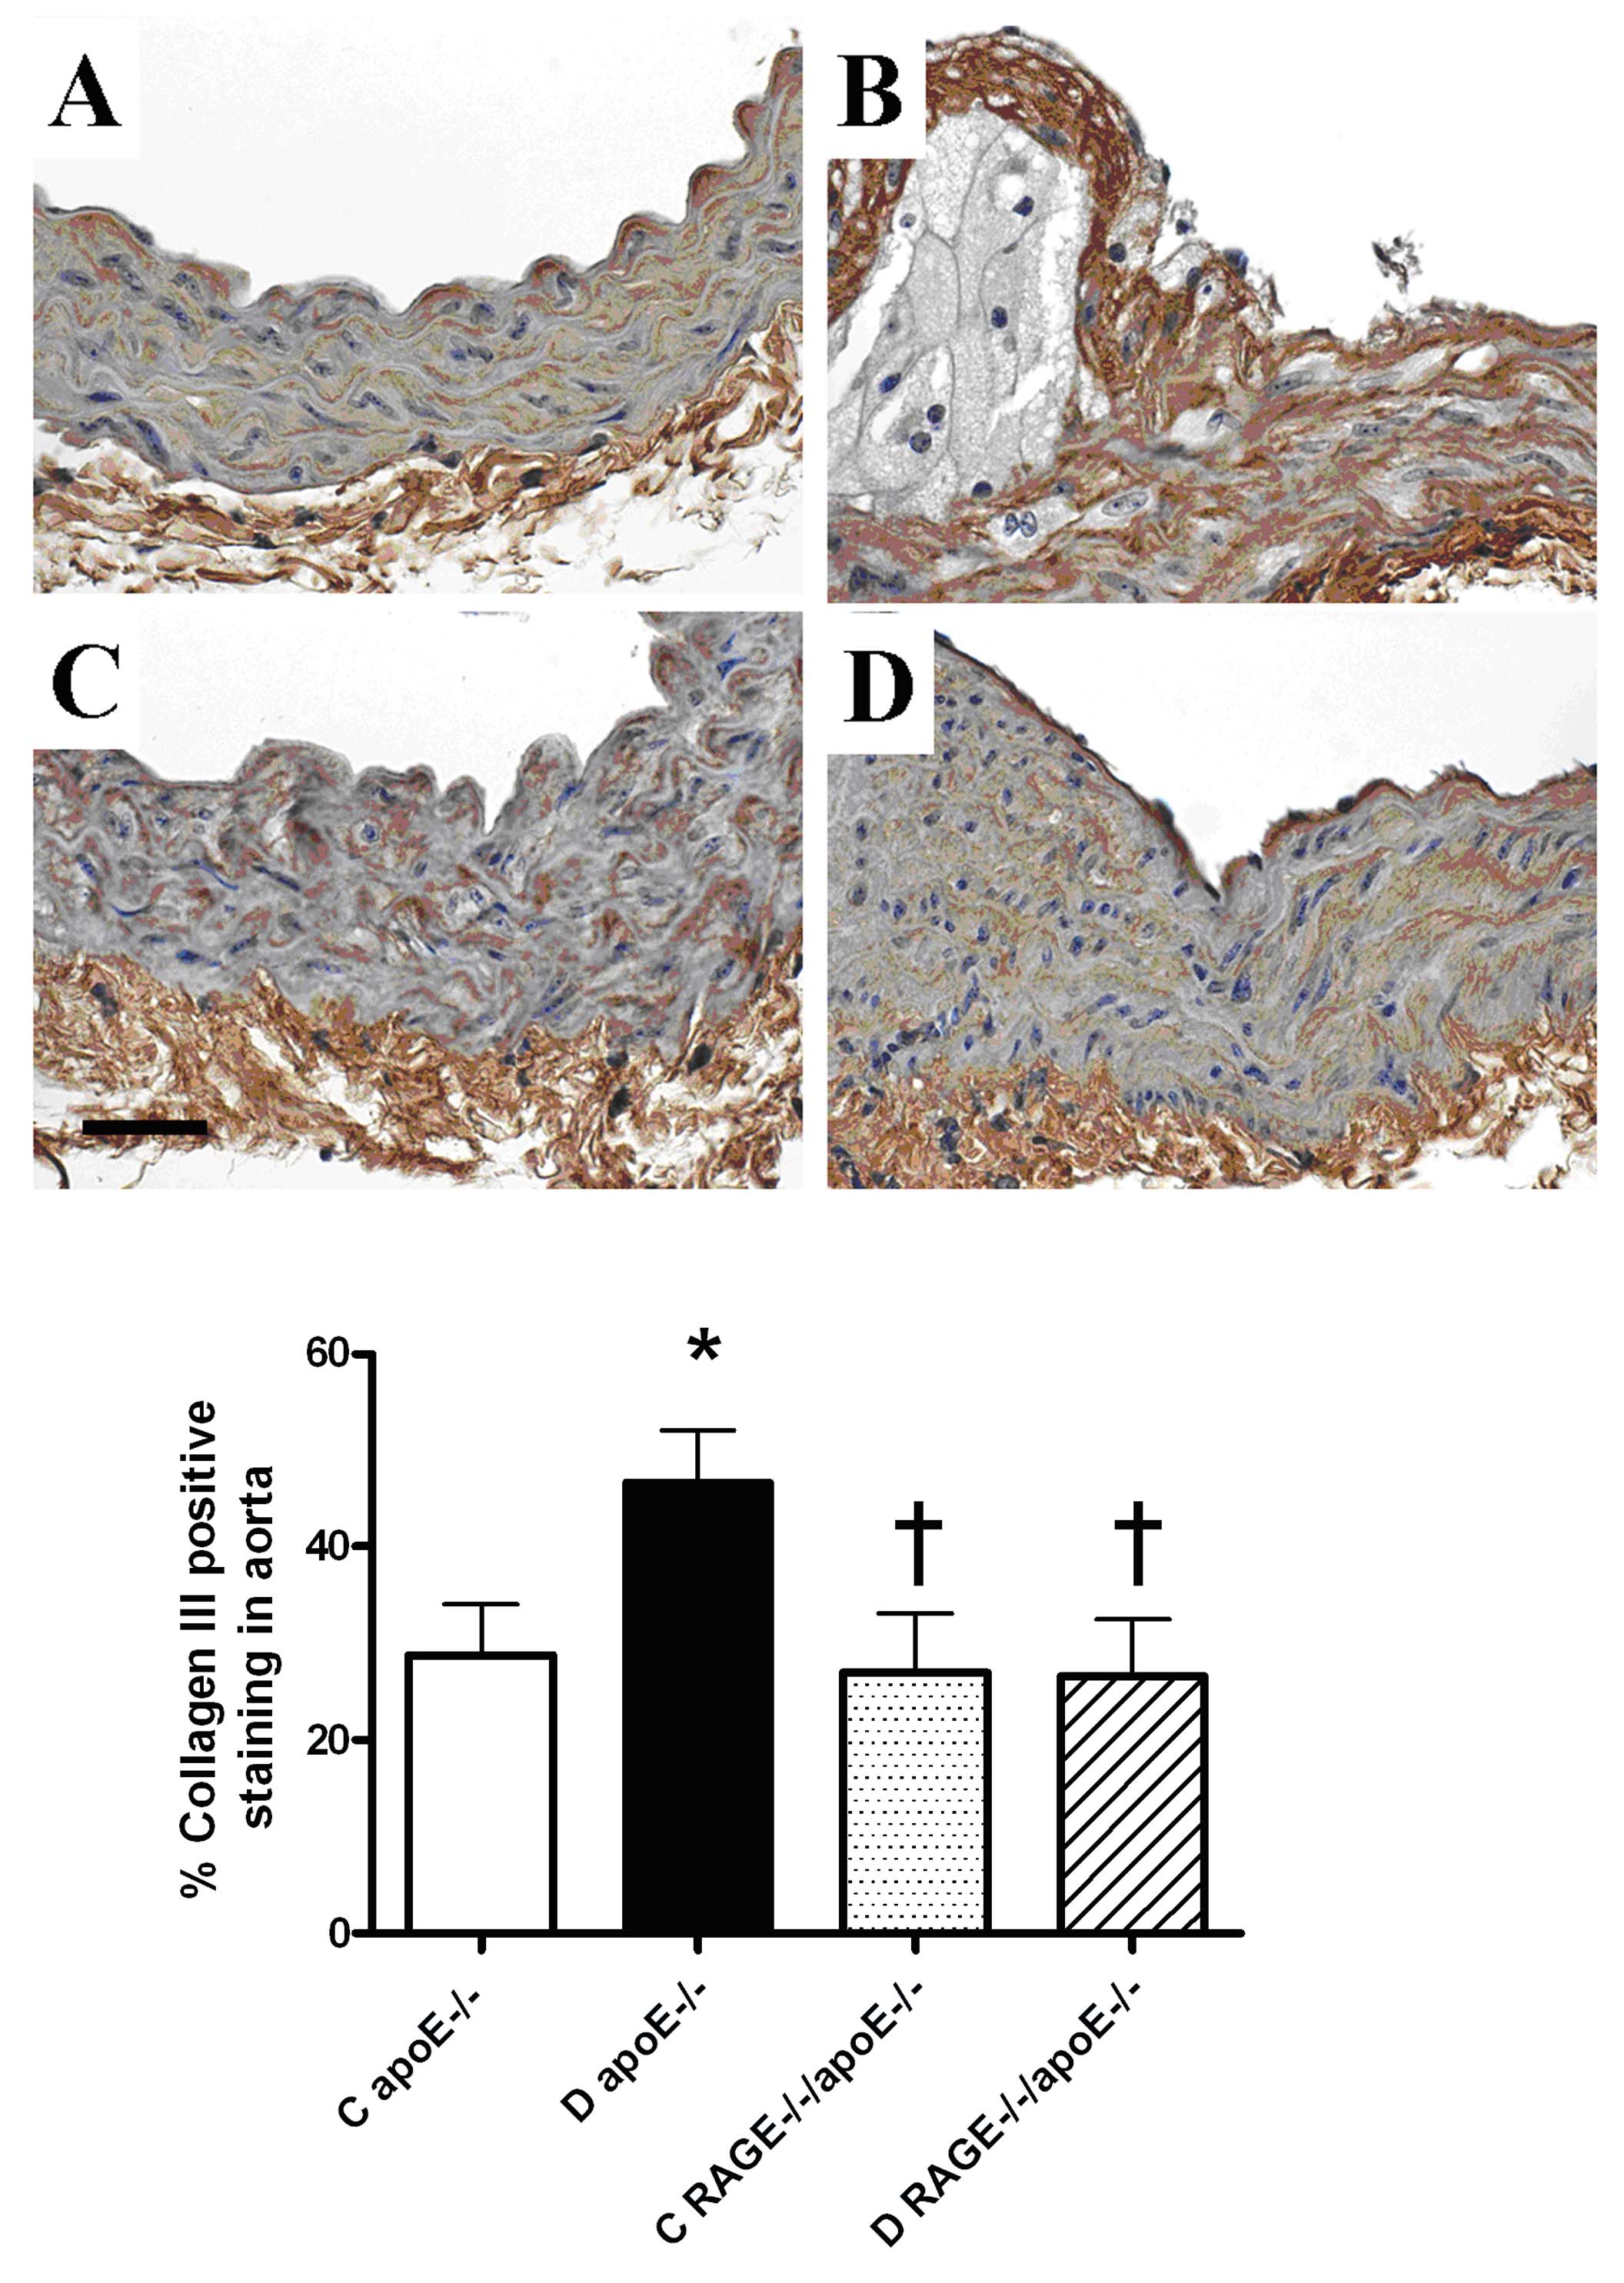
**

**Supplementary Figure 6**

Upper panel:Representative aortic sections demonstrating collagen III staining in control apoE-/- (A), diabetic apoE-/- (B), control RAGE-/-/apoE-/- (C), and diabetic RAGE-/-/apoE-/- (D). Scale bar: 20µm. Lower panel: Graph presenting percentage of collagen III positive area in each group. **P*<0.05 vs control apoE-/-, †*P*<0.01 vs diabetic apoE-/-. Data are expressed as mean±SEM.
